# Supplementary material for: An engineered small RNA-mediated genetic switch based on a ribozyme expression platform
Source: PubMed Central journal article supplement — Nucleic Acids Res. 2013 Apr 12;41(10):5542–52. doi: 10.1093/nar/gkt253 (PMC3664830; doi:10.1093/nar/gkt253), 2013-04-12
Supplement: supp_gkt253_nar-03054-f-2012-File007.pdf [file supp_gkt253_nar-03054-f-2012-File007.pdf]

# Supplementary Data

## An engineered small RNA-mediated genetic switch based on a ribozyme expression platform

Benedikt Klauser<sup>1</sup> and Jörg S. Hartig<sup>1,2,\*</sup>

<sup>1</sup> Department of Chemistry, <sup>2</sup> Konstanz Research School Chemical Biology (KoRS-CB), University of Konstanz, Universitätsstraße 10, 78457 Konstanz, Germany

\* To whom correspondence should be addressed. Tel: +49 7531 884575; Email: [joerg.hartig@uni-konstanz.de](mailto:joerg.hartig@uni-konstanz.de)

### Content:

- Supplementary Figure S1
- Supplementary Figure S2
- Supplementary Sequences

## Supplementary Figure S1

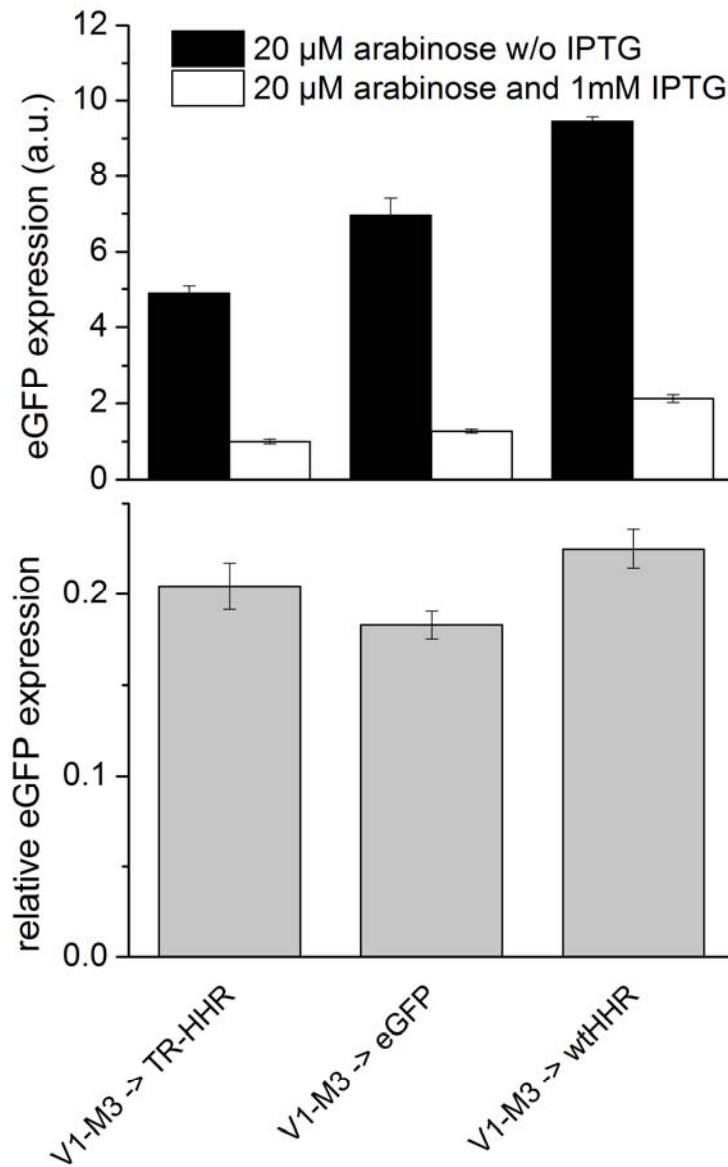

Supplementary Figure S1. The effect of *ta*RNA V1-M3 on the eGFP mRNA under control of the TR-HHR was compared to the effect of *ta*RNA V1-M3 on the native eGFP mRNA and an eGFP mRNA controlled by a wt-HHR. Experiments were conducted with the *E. coli* Top10 strain which was cultivated in LB medium at 37°C. Top: Reporter gene expression of outgrown bacterial cultures induced with either 20μM arabinose without IPTG or 20 μM arabinose supplemented with 1mM IPTG were measured. Bottom: The relative eGFP expression levels of cultures induced with 20μM arabinose with 1mM IPTG to cultures supplemented with 20 μM arabinose without IPTG were determined. Errors bars represent the standard deviation of experiments performed in triplicates.

## Supplementary Figure S2

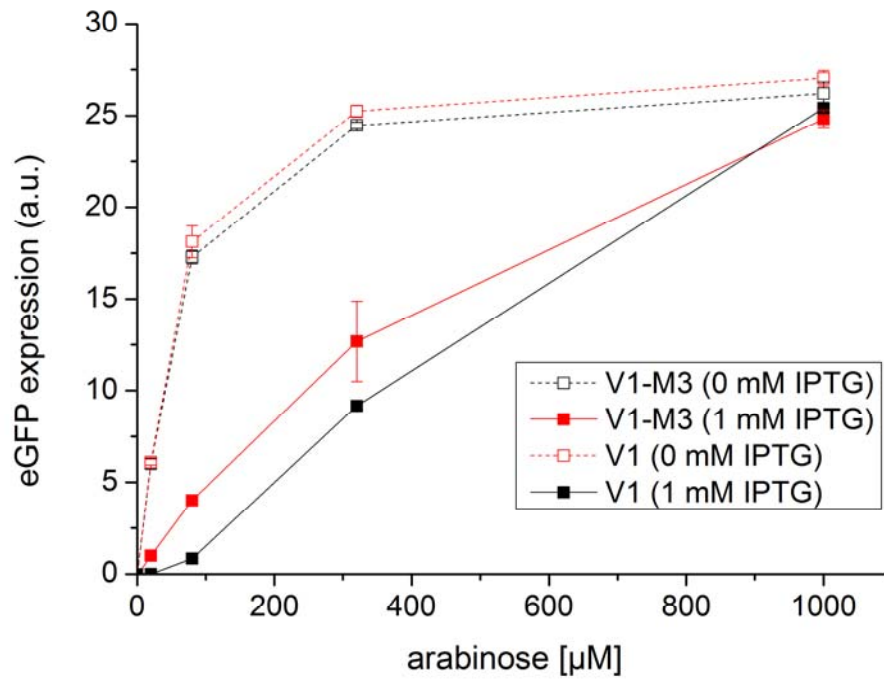

Supplementary Figure S2. The influence of IPTG on eGFP expression of cultures expressing TR-HHR and either *taRNA* V1-M3 or *taRNA* V1 was measured. *E. coli* Top10 strain were used for the experiments and cultivated in LB medium at 37°C. Reporter gene expression levels of outgrown bacterial cultures induced with transcriptional inducers as indicated were determined. Errors bars represent the standard deviation of experiments performed in triplicates.

## Supplementary Sequences

Sequences for the *ta*RNA constructs are shown. Hammerhead ribozyme for 5'-processing is marked in yellow, endonuclease sites used for molecular cloning procedures are in italic and changes in comparison to the *ta*RNA V1 are marked in red.

### *ta*RNA V1

GATCTGGTACC **CGGTACATCCAGCTGATGAGTCCCAAATAGGACGAAACGGTGAAAGCCGTCCT**  
**GGATTCCACG**GGTACCACCCAAATCCAGGAGGTCATTGGTAGTGGTGGTTAATGAAAATTAAGCTT  
ACTACTACCATATATCTCTAGAAAGCTTCCTAGGCTTAAACGCCTGGGGTAATGACTCTCTAGCTT  
G

### *ta*RNA V1i

GATCTGGTACC **CGGTACATCCAGCTGATGAGTCCCAAATAGGACGAT****T**ACGGTGAAAGCCGTCCT  
**GGATTCCACG**GGTACCACCCAAATCCAGGAGGTCATTGGTAGTGGTGGTTAATGAAAATTAAGCTT  
ACTACTACCATATATCTCTAGAAAGCTTCCTAGGCTTAAACGCCTGGGGTAATGACTCTCTAGCTT  
G

### *ta*RNA V1-M1

AGATCTGGTACC **CGGTACATCCAGCTGATGAGTCCCAAATAGGACGAAACGGTGAAAGCCGTCCT**  
**TGGATTCCACG**GGTACCAC **GGTT**ATCCAGGAGGTCATTGGTAGTGGTGGTTAATGAAAATTAAGCTT  
TACTACTACCATATATCTCTAGAAAGCTTCCTAGGCTTAAACGCCTGGGGTAATGACTCTCTAGCTT  
TG

### *ta*RNA V1-M2

AGATCTGGTACC **CGGTACATCCAGCTGATGAGTCCCAAATAGGACGAAACGGTGAAAGCCGTCCT**  
**TGGATTCCACG**GGTACCCTG **GGTTTAGGT**GGAGGTCATTGGTAGTGGTGGTTAATGAAAATTAAGCTT  
TACTACTACCATATATCTCTAGAAAGCTTCCTAGGCTTAAACGCCTGGGGTAATGACTCTCTAGCTT  
TG

### *ta*RNA V1-M3

AGATCTGGTACC **CGGTACATCCAGCTGATGAGTCCCAAATAGGACGAAACGGTGAAAGCCGTCCT**  
**TGGATTCCACG**GGTACCCTG **GGTTTAGGTCCTCC**TCATTGGTAGTGGTGGTTAATGAAAATTAAGCTT  
ACTACTACCATATATCTCTAGAAAGCTTCCTAGGCTTAAACGCCTGGGGTAATGACTCTCTAGCTT  
G

### *ta*RNA V1-M4

AGATCTGGTACC **CGGTACATCCAGCTGATGAGTCCCAAATAGGACGAAACGGTGAAAGCCGTCCT**  
**TGGATTCCACG**GGTACCACCCAAATCCAGGAGGTCATTGGTAGTGGTGGTTAATGAAAATTAAGCTT  
TACTACTACCATATATCTCT **TGGAT**AGAAAGCTTCCTAGGCTTAAACGCCTGGGGTAATGACTCTC  
TAGCTTG

### taRNA V1-M5

AGATCTGGTACC CGGTACATCCAGCTGATGAGTCCCAAATAGGACGAAACGGTGAAAGCCGTCC  
TGGATTCCACGGGTACCACCCAAATCCAGGAGGTCATTGGTAGTGGTGGTTAATGAAAATTA  
TACTACTACCATAT **TAGAGA**AGAAAGCTTCCTAGGCTTAAACGCCTGGGGTAATGACTCTCTAGCT  
TG

### taRNA V1-M6

AGATCTGGTACC CGGTACATCCAGCTGATGAGTCCCAAATAGGACGAAACGGTGAAAGCCGTCC  
TGGATTCCACGGGTACCACCCAAATCCAGGAGGTCATTGGTGGTTAATGAAAATTA  
TATCTCTAGAAAGCTTCCTAGGCTTAAACGCCTGGGGTAATGACTCTCTAGCTTG

### taRNA V1-M7

AGATCTGGTACC CGGTACATCCAGCTGATGAGTCCCAAATAGGACGAAACGGTGAAAGCCGTCC  
TGGATTCCACGGGTACCCTACCTTTGTCTTCTTTAATACCCAAATCCAGGAGGTCATTGGTAGAAGC  
TTCTAGGCTTAAACGCCTGGGGTAATGACTCTCTAGCTTG

### Crl

AGATCT **GAAGAGAGGTATGACTGCCGCAATTCAGCGCATAGGCCGACGAT**CTCCAGGCCGTGGG  
CTTAAAGCCTGGGGTAATGACTCTCTAGCTTG

Sequences for the reporter genes used in this study are shown. P<sub>Bad</sub> promoters are underlined, hammerhead ribozymes are marked in yellow, translation start /end sites are written in bold letters and endonuclease sites used for molecular cloning procedures are in italic.

### P<sub>Bad</sub> - **TR-HHR** – eGFP – 3'UTR

GACGCTTTTTATCGCAACTCTCTACTGTTTCTCCATACCACTAGTGGACGTTTAGCTTTCTCCTTC  
GGTACATCCAGCTGATGAGTCCCAAATAGGACGAAACCTCTTGGATTTGGGTATTAAGAGGTCC  
TGGATTCCACGAAGGAGATATACC**ATG**...**TAA**ATGCTCGAGGATCCGGCTGCTAACAAAGCCCGA  
AAGGAAGCTGAGTTGGCTGCTGCCACCGCTGAGCAATACCGCGG

### P<sub>Bad</sub> - **wt-HHR** – eGFP – 3'UTR

GACGCTTTTTATCGCAACTCTCTACTGTTTCTCCATACCACTAGTGGACGTTTAGCTTTCTCCTTC  
GGTACATCCAGCTGATGAGTCCCAAATAGGACGAAACGGTGAAAGCCGTCCTGGATTCCACGAA  
GGAGATATACC**ATG**...**TAA**ATGCTCGAGGATCCGGCTGCTAACAAAGCCCGAAAGGAAGCTGAGT  
TGGCTGCTGCCACCGCTGAGCAATACCGCGG

### P<sub>Bad</sub> - eGFP - 3'UTR

GACGCTTTTTATCGCAACTCTCTACTGTTTCTCCATACCACTAGTGGACGTTTAGCTTTAAGAAGG  
AGATATACC**ATG...TAA**TGCTCGAGGATCCGGCTGCTAACAAAGCCCGAAAGGAAGCTGAGTTG  
GCTGCTGCCACCGCTGAGCAATACCGCGG
